# Supplementary material
Source: Springer Nature journal article supplement (https://www.springermedizin.de/resource/supplementary/12887_2013_1000_MOESM1_ESM.pdf/9476926)
Supplement: MOESM1 [file 9476926]

Exposed  
Children one to three years of age  
who suffered a fracture of the femur  
shaft during the study period  
n = 1,466

Excluded  
owing to a congenital  
medical condition  
affecting the bone  
quality  
or a diagnosis  
indicating censoring  
prior to femur shaft  
fracture  
n = 62

Unexposed  
Up to 10 randomly selected  
controls for each case  
n = 13,925

Excluded  
owing to a congenital  
medical condition  
affecting the bone  
quality  
or a diagnosis  
indicating censoring  
prior to femur shaft  
fracture  
n = 111

Study base  
n = 1,404 exposed  
n = 13,814 unexposed
